## 16.4.2 - Nonpharmacological Treatment

## Living after veno-arterial extracorporeal membrane oxygenator support: post-traumatic stress disorder symptoms.

Alonso Fernandez De Gatta M.<sup>1</sup>; Gonzalez Cebrian M.<sup>2</sup>; Merchan Gomez S.<sup>2</sup>; Toranzo Nieto I.<sup>2</sup>; Diego Nieto A.<sup>2</sup>; Martin Herrero F.<sup>2</sup>; Barrio A.<sup>2</sup>; Rodriguez Estevez L.<sup>2</sup>; Sanchez PL.<sup>2</sup>

<sup>1</sup>University Hospital of Salamanca - CM19-00055 Instituto de Salud Carlos III, Salamanca, Spain

<sup>2</sup>Complejo Asistencial Universitario de Salamanca, Salamanca, Spain

**Funding Acknowledgements:** Type of funding sources: Public Institution(s). Main funding source(s): Instituto de Salud Carlos III in Spain (Co-funded by European Social Fund "Investing in your future").

**INTRODUCTION:** Post-intensive care syndrome includes post-traumatic stress disorder (PTSD), reaching 27%. Veno-arterial extracorporeal membrane oxygenation (VA-ECMO) provides cardiopulmonary support in severe hemodynamic instability situations.

**PURPOSE:** Assess the prevalence of PTSD symptoms in adult survivors from Intensive Cardiac Care Unit (ICCU) admission requiring VA-ECMO support.

### METHODS

Analysis of patients discharged after VA-ECMO in a referral hospital. They were screened through abbreviated Impact of Event Scale-6 (IES-6; 6 items). Its score was calculated as total (0-6 points) and mean (0-1). Respondents are asked to report their situation at the moment of screening (median time from discharge 31.4 [36] months).

**RESULTS:** Out of 135 VA-ECMO implants from 2013 to October 2020, 35.6% survived the ICCU admission.

After 31.4 [36] months follow-up, 40 patients remain alive. 34 patients responded to questionnaire. All patients required sedation and invasive mechanical ventilation. Baseline situation and complications are summarized in Table.

Total and mean score on the IES-6 were  $1.26 \pm 2.11$  and  $0.21 \pm 0.35$  respectively. Up to 29.4% of patients had PTSD symptoms (Figure).

The total and mean score in IES-6 was significantly correlated with the time elapsed since admission ( $R = 0.428$ ,  $p = 0.012$  and  $R = 0.427$ ,  $p = 0.012$  respectively). The patients with altered IES-6 items had passed a longer time since admission in ICCU ( $44 \pm 15$  vs  $30 \pm 20$  months,  $p = 0.034$ ).

**CONCLUSION:** Survivors from admission requiring VA-ECMO support show high prevalence of PTSD symptoms, appearing more frequently when more time has elapsed since admission. Special attention should be paid to psychological symptoms after VA-ECMO.

Table. Implant status and complications

| Implant status and complications of VA-ECMO survivors. N = 34 |            |                                          |            |
|---------------------------------------------------------------|------------|------------------------------------------|------------|
| Age (years) (mean+ SD)                                        | 61.3 ± 10  | Brigde to (n,%)                          | 29 (85.3%) |
| Male (n, %)                                                   | 29 (85.3%) | Recovery                                 | 3 (8.8%)   |
| Indication (n,%)                                              |            | Transplant                               | 0 (0%)     |
| Cardiogenic shock                                             | 14 (41.1%) | Ventricular assist device                | 2 (5.9%)   |
| Refractory cardiac arrest                                     | 2 (5.9%)   | Elective High-risk PCI                   |            |
| Electrical storm                                              | 6 (17.6%)  | Percutaneous implant (n,%)               | 21 (61.8%) |
| High-risk percutaneous coronary intervention                  | 2 (5.9%)   | Femoro-femoral                           | 28 (82.4%) |
| Postcardiotomy shock                                          | 10 (29.4%) | Intraaortic balloon pump                 | 10 (29.4%) |
|                                                               |            | Time ECMO support (days)                 | 5.9 ± 3.6  |
|                                                               |            | Time under mechanical ventilation (days) | 14.5 ± 22  |

| Implant status and complications of VA-ECMO survivors. N = 34 |            |                                           |            |
|---------------------------------------------------------------|------------|-------------------------------------------|------------|
| pH (mean + SD)                                                | 7.3 ± 0.2  | Complications (n,%)                       | 10 (29.4%) |
| lactate (mmol/L) (mean + SD)                                  | 6.3 ± 4.6  | Vascular (bleeding, ischemia)             | 11 (32.4%) |
| Left ventricular ejection fraction (%) (mean + SD)            | 30.6 ± 16  | Bleeding (minor or major)                 | 20 (58.8%) |
| Right ventricular dysfunction (n,%)                           | 20 (58.8%) | Critical care infections during admission |            |
| Noradrenaline                                                 | 30 (88.2%) | Ischemic/hemorrhagic stroke               | 1 (2.9%)   |
| Dobutamine                                                    | 27 (79.4%) | Renal replacement therapy                 | 9 (26.5%)  |
| Adrenaline                                                    | 11 (32.4%) | Tracheostomy                              | 10 (29.4%) |
| Preimplant cardiac arrest (n,%)                               | 19 (55.9%) | Critically illness polyneuropathy         | 15 (44.1%) |
| Cardiac arrest duration (min) (n,%)                           | 14 ± 14    |                                           |            |
| Extracorporeal cardiopulmonary resuscitation (ECPR) (n,%)     | 3 (8.8%)   |                                           |            |

Abstract Figure. IES-6 results.

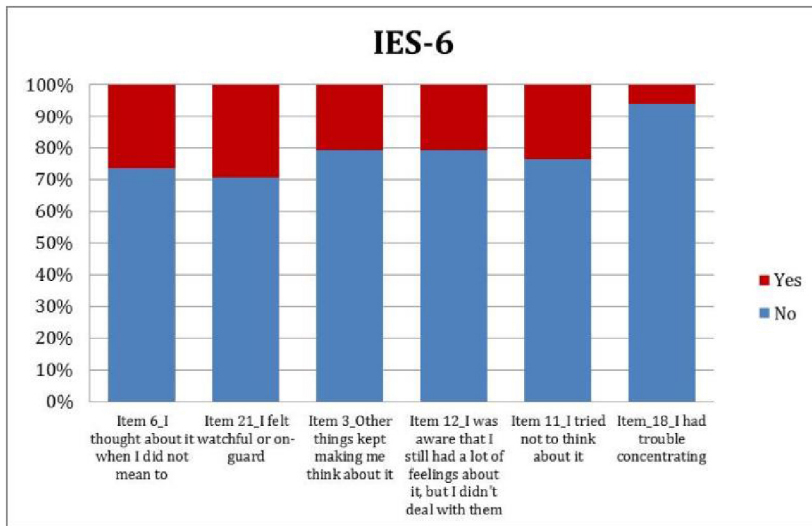

Source: http://academic.oup.com/ehjacc/article-pdf/10/Supplement_1/zuab020.031/37406807/zuab020.031.pdf
